# Supplementary material for: Silver vanadium bronze, β-Ag0.33V2O5: crystal-water-free high-capacity cathode material for rechargeable Ca-ion batteries
Source: Royal Society of Chemistry journal article supplement (doi:10.1039/d1ta03881h), 2021-01-01
Supplement: d1ta03881h1.pdf [file d1ta03881h1.pdf]

[Supporting Information]

## **Silver Vanadium Bronze, $\beta$ -Ag<sub>0.33</sub>V<sub>2</sub>O<sub>5</sub>: Crystal-Water-Free High-Capacity Cathode Material for Rechargeable Ca-ion Batteries**

Joeun Hyung,<sup>a</sup> Jongwook W. Heo,<sup>a</sup> Boosik Jeon<sup>a</sup> and Seung-Tae Hong<sup>a,b\*</sup>

<sup>a</sup> Department of Energy Science and Engineering, DGIST (Daegu Gyeongbuk Institute of Science and Technology), Daegu 42988, Republic of Korea.

<sup>b</sup> Energy Science of Engineering Research Center, DGIST, Daegu 42988, Republic of Korea.

\*Corresponding author: st.hong@dgist.ac.kr

### **Table of contents**

1. Supporting Figures
2. Supporting Tables

## 1. Supporting Figures

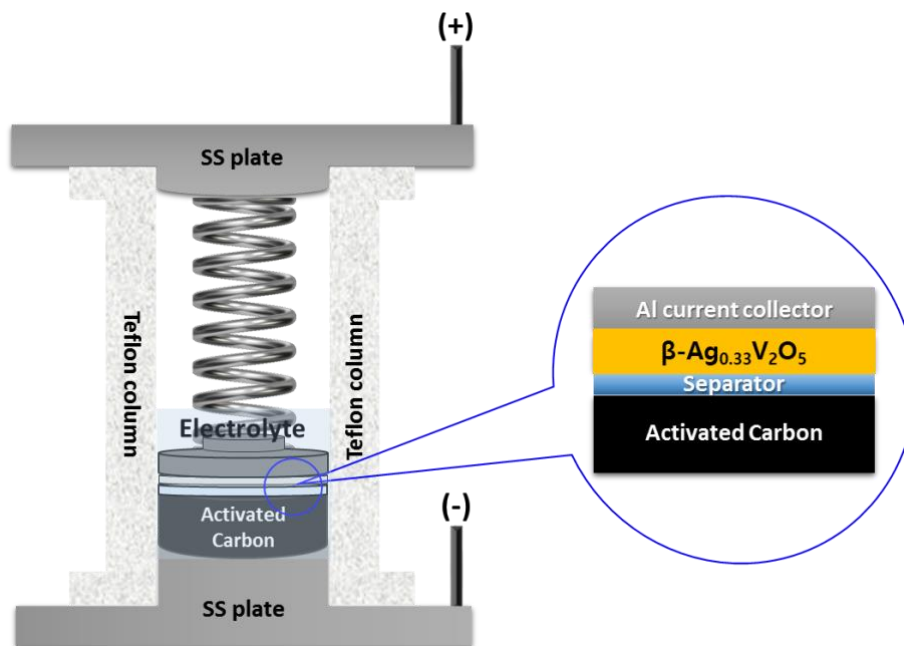

Fig. S1. Schematic illustration of the homemade cell.

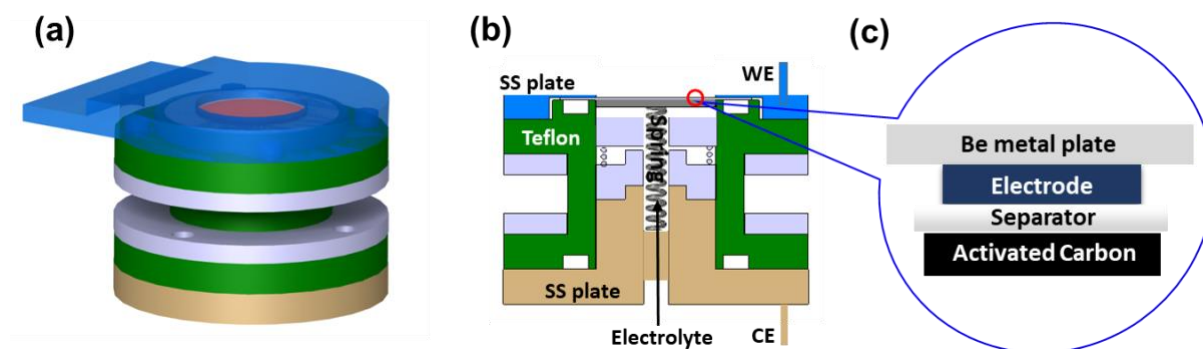

Fig. S2. Schematic configurations for in-situ XRD cell.

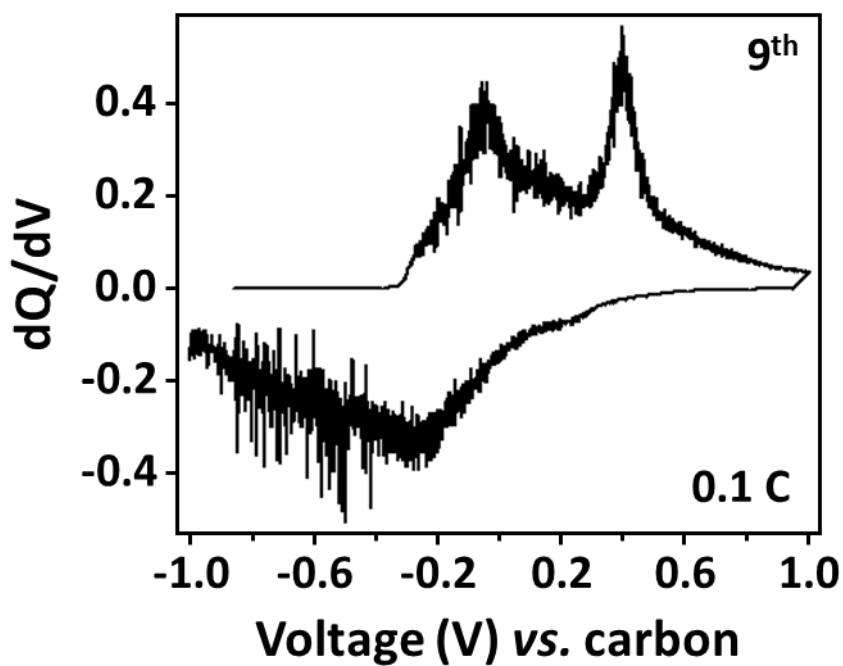

Fig. S3. dQ/dV plot for ninth galvanostatic cycle in Figure 2b.

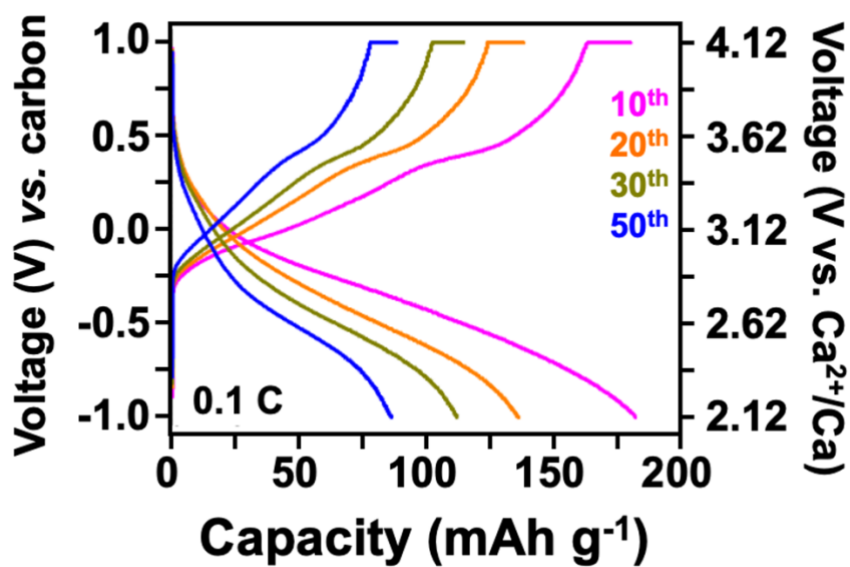

Fig. S4. Galvanostatic discharge–charge cycles of  $\beta\text{-Ag}_{0.33}\text{V}_2\text{O}_5$  after the activation cycles at 0.1 C rate and 30 °C in 0.5 M  $\text{Ca}(\text{BF}_4)_2$  in EC/PC (1:1 v/v)

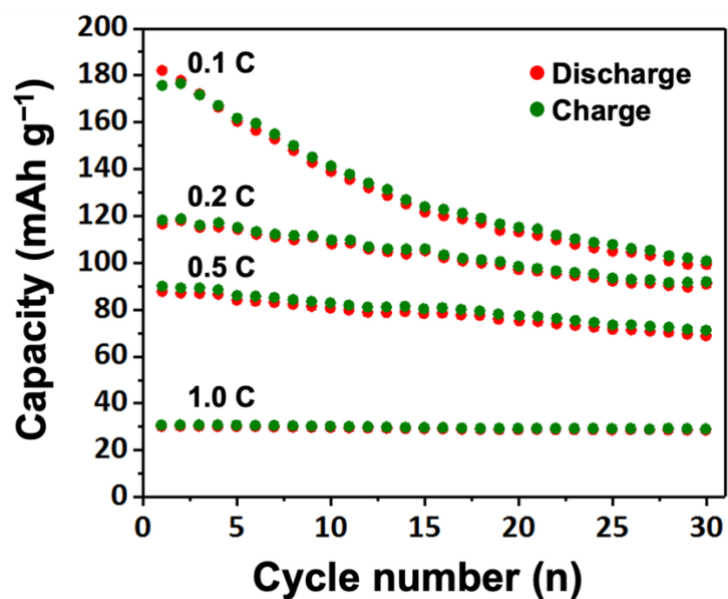

**Fig. S5.** Rate performance of  $\beta$ - $\text{Ag}_{0.33}\text{V}_2\text{O}_5$  at 0.1, 0.2, 0.5, and 1 C rates in 0.5 M  $\text{Ca}(\text{BF}_4)_2$  in EC/PC (1:1 v/v) at 30 °C. These data were obtained after the electrochemical activation process for eight cycles at 0.1 C rate.

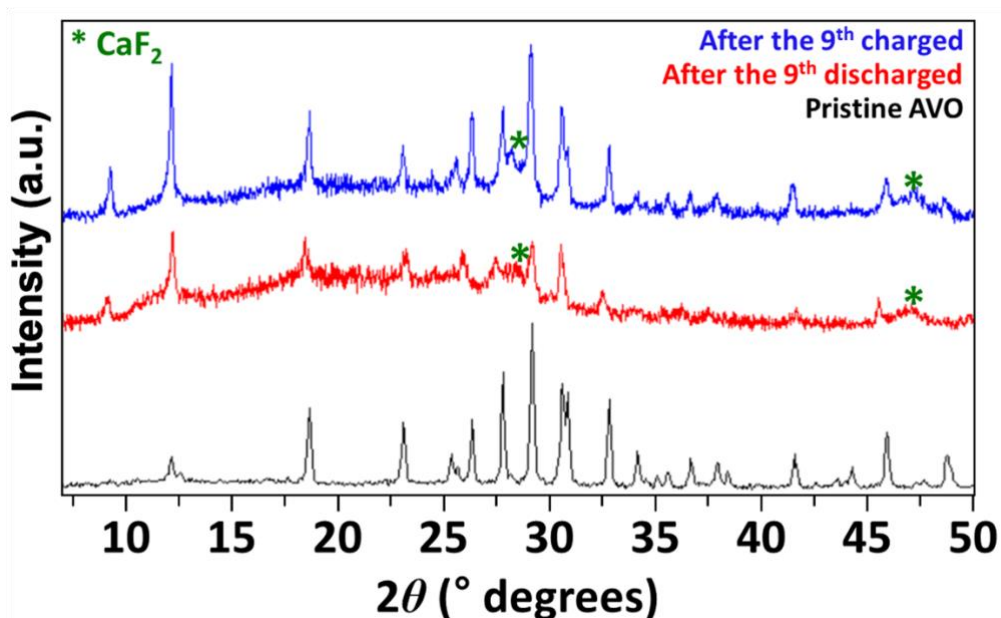

**Fig. S6.** Ex-situ XRD patterns of  $\beta$ - $\text{Ag}_{0.33}\text{V}_2\text{O}_5$ . Pristine (black), ninth discharged (red), ninth charged (blue), and  $\text{CaF}_2$  (denoted by green stars).

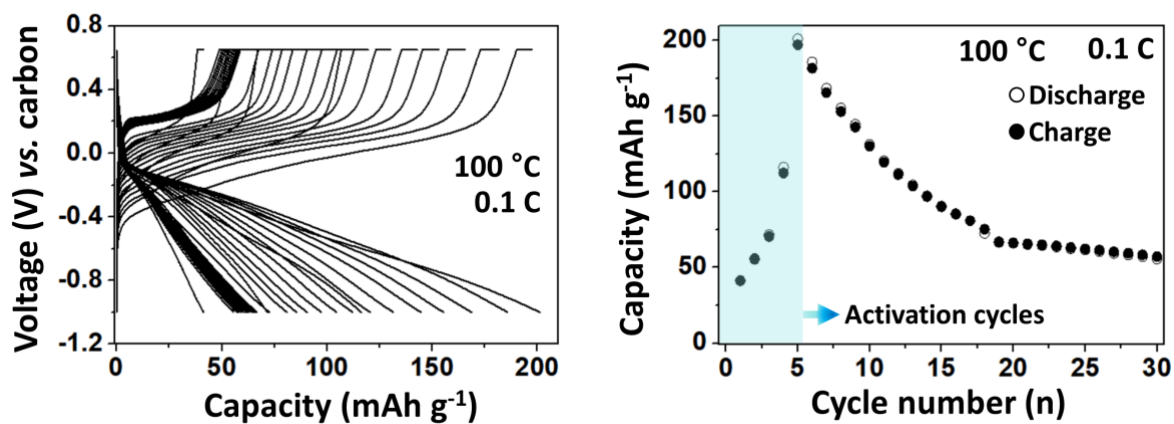

Fig. S7. Electrochemical properties of  $\beta\text{-Ag}_{0.33}\text{V}_2\text{O}_5$  at  $100\text{ }^\circ\text{C}$  in  $0.5\text{ M Ca}(\text{ClO}_4)_2$  in EC/PC (1:1 v/v) at  $0.1\text{ C}$  rate. (a) Galvanostatic discharge–charge cycles and (b) cyclability and Coulombic efficiency for 30 cycles.

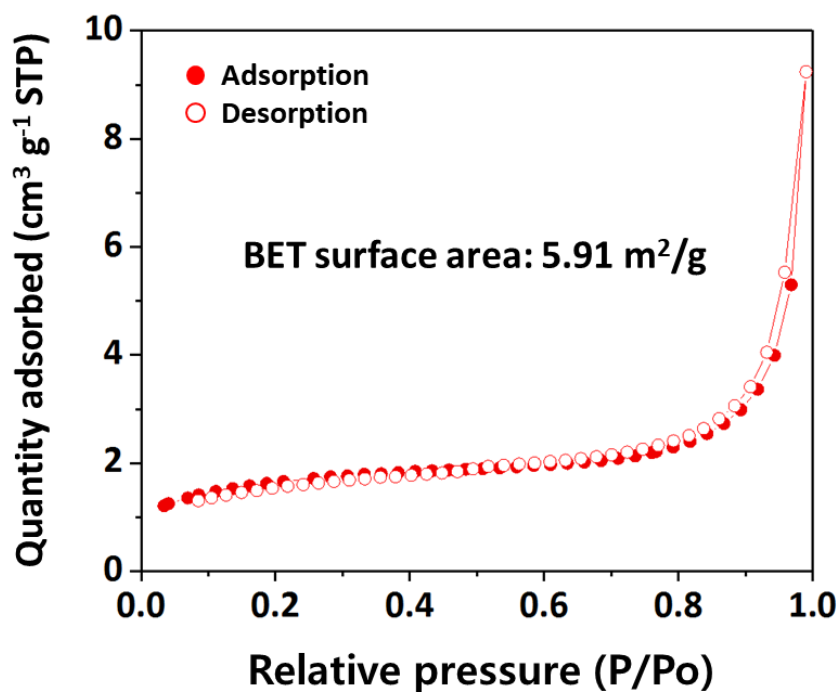

Fig. S8. Nitrogen sorption isotherm for  $\beta\text{-Ag}_{0.33}\text{V}_2\text{O}_5$  (●, adsorption; ○, desorption).

## 2. Supporting Tables

**Table S1.** Crystallographic data and powder X-ray Rietveld refinement results for  $\beta$ - $\text{Ag}_{0.33}\text{V}_2\text{O}_5$ : atomic coordinates, site occupancies, isotropic displacement parameters, and reliability factors at room temperature.

| Crystal System               | Monoclinic                                                                                                            |     |        |         |           |                              |
|------------------------------|-----------------------------------------------------------------------------------------------------------------------|-----|--------|---------|-----------|------------------------------|
| Space Group                  | $C2/m$ (no. 12)                                                                                                       |     |        |         |           |                              |
| Lattice Parameter, Volume, Z | a = 15.373(1) Å, b = 3.6112(2), c = 10.064(1) Å<br>$\beta = 109.68(1)^\circ$<br>V = 526.10(6) Å <sup>3</sup><br>Z = 6 |     |        |         |           |                              |
| Atoms                        | x                                                                                                                     | y   | Z      | Wyckoff | Occupancy | $U_{\text{iso}} \times 10^2$ |
| Ag1                          | 0.9961                                                                                                                | 0.0 | 0.5965 | 4i      | 0.5       | 1.25                         |
| V1                           | 0.1167                                                                                                                | 0.0 | 0.119  | 4i      | 1.0       | 1.25                         |
| V2                           | 0.3379                                                                                                                | 0.0 | 0.1008 | 4i      | 1.0       | 1.25                         |
| V3                           | 0.2880                                                                                                                | 0.0 | 0.4102 | 4i      | 1.0       | 1.25                         |
| O1                           | 0.0                                                                                                                   | 0.0 | 0.0    | 2a      | 1.0       | 1.25                         |
| O2                           | 0.1075                                                                                                                | 0.0 | 0.2729 | 4i      | 1.0       | 1.25                         |
| O3                           | 0.1332                                                                                                                | 0.5 | 0.0776 | 4i      | 1.0       | 1.25                         |
| O4                           | 0.2634                                                                                                                | 0.0 | 0.2232 | 4i      | 1.0       | 1.25                         |
| O5                           | 0.4369                                                                                                                | 0.0 | 0.2187 | 4i      | 1.0       | 1.25                         |
| O6                           | 0.3143                                                                                                                | 0.5 | 0.0539 | 4i      | 1.0       | 1.25                         |
| O7                           | 0.3986                                                                                                                | 0.0 | 0.4731 | 4i      | 1.0       | 1.25                         |
| O8                           | 0.2420                                                                                                                | 0.0 | 0.5733 | 4i      | 1.0       | 1.25                         |

\*  $R_p = 0.123$ ,  $R_{wp} = 0.165$ ,  $R_{exp} = 0.140$ ,  $R(F^2) = 0.115$ ,  $\chi^2 = 1.391$

**Table S2.** Selected interatomic distances (Å) for structure of  $\beta$ - $\text{Ag}_{0.33}\text{V}_2\text{O}_5$

|       |             |       |             |
|-------|-------------|-------|-------------|
| Ag-Ag | 1.986 (1) Å | Ag-O2 | 2.382 (1) Å |
| Ag-O5 | 2.548 (1) Å | Ag-O7 | 2.408 (1) Å |
| Ag-O7 | 2.671 (1) Å | V1-O1 | 1.790 (1) Å |
| V1-O2 | 1.602 (1) Å | V1-O3 | 1.890 (1) Å |
| V1-O4 | 2.143 (1) Å | V1-O6 | 2.323 (1) Å |
| V2-O3 | 1.989 (1) Å | V2-O4 | 1.944 (1) Å |
| V2-O5 | 1.583 (1) Å | V2-O6 | 1.878 (1) Å |
| V2-O6 | 2.333 (1) Å | V3-O4 | 1.790 (1) Å |
| V3-O7 | 1.602 (1) Å | V3-O8 | 1.994 (1) Å |
| V3-O8 | 1.885 (1) Å |       |             |

**Table S3.** Elemental ratios estimated from ICP analysis for  $\beta$ -Ag<sub>0.33</sub>V<sub>2</sub>O<sub>5</sub> (AVO) electrodes.

|                                                      | ppm   |       |       | Relative atomic ratio |      |      |
|------------------------------------------------------|-------|-------|-------|-----------------------|------|------|
|                                                      | Ca    | Ag    | V     | Ca                    | Ag   | V    |
| Pristine AVO                                         | N.D.  | 66.01 | 191.1 | N.D.                  | 0.33 | 2.00 |
| <b>0.5M Ca(BF<sub>4</sub>)<sub>2</sub> in PC:EC</b>  |       |       |       |                       |      |      |
| After the 1 <sup>st</sup> discharged                 | -     | 13.40 | 42.19 | -                     | 0.30 | 2.00 |
| After the 1 <sup>st</sup> charged                    | -     | 12.81 | 39.32 | -                     | 0.31 | 2.00 |
| After the 9 <sup>th</sup> discharged                 | -     | 4.83  | 33.84 | -                     | 0.13 | 2.00 |
| After the 9 <sup>th</sup> charged                    | -     | 2.87  | 37.02 | -                     | 0.07 | 2.00 |
| <b>0.5M Ca(ClO<sub>4</sub>)<sub>2</sub> in PC:EC</b> |       |       |       |                       |      |      |
| After the 5 <sup>th</sup> discharged                 | 10.44 | 3.514 | 31.99 | 0.83                  | 0.10 | 2.00 |
| After the 5 <sup>th</sup> charged                    | 0.432 | 1.735 | 34.16 | 0.03                  | 0.05 | 2.00 |

N.D.: not detected
